# Supplementary material for: Urinary extracellular vesicles contain mature transcriptome enriched in circular and long noncoding RNAs with functional significance in prostate cancer
Source: PubMed Central journal article supplement — J Extracell Vesicles. 2022 May 8;11(5):e12210. doi: 10.1002/jev2.12210 (PMC9081490; doi:10.1002/jev2.12210), 2022-05-08
Supplement: JEV2-11-e12210-s009.pdf [file JEV2-11-e12210-s009.pdf]

## 1 **Supplemental text**

2

### 3 **Quality control of RNA and RNA-seq**

4 To perform the quality control of our samples (registered on EV-TRACK platform<sup>1</sup> with the EV-TRACK  
5 ID EV210255), we first evaluated, by Nanoparticle tracking analysis (NTA), the sizes distribution of uEVs  
6 and cEVs. The analysis showed classical EVs size distribution ranging from 50 to 300nm in diameter,  
7 with a peak between 100 and 150 nm, suggesting that we got exosomes and microvesicles (Extended  
8 Data Fig. 1a). Transmission Electron Microscopy images obtained for uEVs, DU145-, LNCaP- and PC3-  
9 EVs showed the presence, in each sample, of various size EVs. We also noticed that the amount of EVs  
10 present in urine and produced by DU145 and PC3 was high unlike the EVs produced by LNCaP cells.  
11 UEVs preparation seems clean without contamination by polymers of the Tam Horsfall protein (THP;  
12 uromodulin) (Extended Data Fig. 1b). Before sequencing, we examine the quantity and quality of  
13 extracted RNA from uEVs, cEVs, cells and FFPE PCa samples. By Qubit and NanoDrop RNA  
14 quantification we found that uEVs RNA yields were heterogenous and depend on the patient from 150  
15 ng to 3 µg RNA. The ratios 260/280 and 260/230 were on average 1.9 and 1.1 respectively for the 6  
16 paired uEVs samples, 1.8 and 0.9 for the 20 independent uEVs samples, 1.7 and 0.8 for cell-EVs and 2  
17 and 1.8 for cells (Extended Data Fig. 1e and Extended Data Table1). uEVs, cEVs and FFPE RNA samples  
18 were checked by Bioanalyzer and found to have different RNA profiles (Extended Data Fig.1f, g,  
19 Extended Data Table1). All 6 paired uEVs RNAs shown similar profiles to those previously published  
20 with a peak at 120 nt (Extended Data Fig.1f). FFPE RNA profiles shown RNA degradation but except for  
21 one sample, DV200 were >70% (Extended Data Fig. 1g, Extended Data Table1). cEVs RNAs and  
22 independent uEVs RNAs presented similar profiles to the 6 paired uEVs ones (data not shown).

23 The RNA-seq reads quality and alignment were controlled by using MultiQC and shown an average of  
24 45million of total reads (35 M to 59M) and 45 million (36M to 44 for respectively, 6 tumor prostate  
25 FFPE biopsies and 6 uEVs. The percentage of aligned reads on human genome hg38 were on average

26 94% (93% to 96%) and 90% (86% to 94%) of reads. Because of ribosomal RNAs depletion during the  
27 library's preparations, only around 1.8% of aligned reads correspond to ribosomal RNAs (Extended  
28 Data Table 1). The quality control for the 20 independent uEVs and cell-EVs gave similar data (Extended  
29 Data Table 1).

30 The workflow of the bioinformatics analysis is presented in Extended Data Fig.2a. Read counting was  
31 performed for each sample, on the human gene annotation (Gencode v32) and on the human repeats,  
32 using Kallisto. In parallel, CIRI2 was used to discover the location of circRNAs (back-spliced reads) and  
33 to quantify them. Annotation and counts from human genes, repeats and circRNAs were combined to  
34 establish a count table with 61 053 official annotated genes, 15 352 repeats and 38 793 circRNAs. Then,  
35 the conditions FFPE and uEVs were compared using DESeq2. Only the features with adjusted p-value  
36  $\leq 0.05$  and fold change  $\geq 1.5$  were retained as differentially expressed (Extended Data Fig.2a).

37

### 38 **Selection of genes expressed in urinary EVs, specific to the prostate tissue**

39 To ascertain the presence and select of prostate enriched genes expressed in uEVs, we took advantage  
40 of public RNAseq data from a study that included 7 prostate normal tissues that we compared to two  
41 other urological tissues, that are in relation with urine, 4 kidney and 6 urinary bladder normal tissues,  
42 to eliminate transcripts coming from these last two tissues<sup>2</sup>, accession numbers ERR315340,  
43 ERR315468 and ERR315453. We subsequently did differential expression analysis between prostate  
44 and kidney and, between prostate and urinary bladder using the same criteria as for FFPE versus uEVs  
45 analysis (Gencode 32, fold change  $\geq 1.5$  and  $\text{padj} \leq 0.05$ ) (Extended Data Fig. 3a).

46 Overlapping genes derived from each comparison: expressed genes in prostate cancer urinary EVs  
47 (n=10937, Gencode32 annotation, mean counts  $\geq 20$ ), down regulated genes in healthy kidney  
48 (n=3644) and in urinary bladder (n=3982) compared to healthy prostate, were shown using Venn  
49 diagram. At least 1248 uEVs expressed genes are the subset of down regulated genes in kidney and  
50 urinary bladder compared to prostate tissue indicating that at least 1248 robust RNAs of uEVs come

51 from prostate (*SuperExactTest*,  $p < 10^{-320}$ )<sup>3</sup>. Because the sequences came from polyA-RNAs, we could  
52 not access to circRNAs, unpolyadenylated lncRNAs and small RNAs from the public data and probably  
53 much more uEVs transcripts derived from prostate exclusively (Extended data Fig. 3b and Extended  
54 Data Table 3). To verify the origin of uEVs RNAs, we checked the expression, in uEVs and FFPE, of  
55 several known RNAs markers of normal or tumor prostate tissues, KLK2, KLK3, PCA3 and PMEPA1.  
56 Normal and tumor prostate markers were confirmed highly expressed in FFPE and uEVs. On the  
57 contrary, UMOD and UPK2 RNAs highly expressed in kidney and urinary bladder respectively were  
58 almost not expressed in FFPE tissues and present at low level in uEVs showing the enrichment of EVs  
59 derived from prostate (tumor) tissue in collected urine (Extended Data Fig. 3c).

60

61 **Extended Data Figures legends**

62 **Extended Data Fig. 1. Characterization of EVs isolated from urine and culture supernatant. a.**

63 Characterization of EVs by nanoparticle tracking analysis (NTA) showing average distribution of vesicle  
64 size coming from urine (black), PC3 (orange), LNCaP (bleu) and DU145 (pink) cell lines. **b.** Transmission  
65 electron microscopy images of EVs from urine, PC3, LNCaP and DU145 cell lines. Scale bar sizes are 100  
66 and 200 nm for urinary EVs and cell EVs respectively. Yellow arrows show some EVs with variable size.  
67 **c.** The pellets recovered from 3 ultracentrifuged urines (lines 1,2,3) and HEK293 cell lysate (line 4) were  
68 analyzed by Western blot for the indicated proteins side by side. Stain free gel images of total amounts  
69 of proteins were used to quantify the relative level of analyzed proteins. **d.** Western blot analysis, for  
70 the indicated proteins side by side, of PC3 and DU145 cell lysates (C) and enriched cell-EVs (V). Total  
71 amounts of proteins were shown by stain free gel images. **e.** Optical density profiles of RNAs giving  
72 their purity. Position of 230 and 260 nm absorbance are shown by black vertical lines. **f and g.** RNA  
73 Profiles analyzed by capillary electrophoresis giving their quality. Electropherograms show in the y-axis  
74 fluorescence units (FU) and in the x-axis the nucleotide length (nt) of 10 ng of RNA extracted from uEVs  
75 (f) and 0.5 ng from FFPE (g) paired samples. Peaks at 25 nucleotides represent internal standards and  
76 peaks at 2,000 nt and 4000 nt represent 18S and 28 S ribosomal RNAs, respectively.

77

78 **Extended Data Fig. 2. Full transcriptome of paired liquid and solid biopsies of prostate cancer**

79 **patients. a.** Bioinformatic procedure for differential RNA expression analysis between Tumor biopsies  
80 and uEVs. The number of total official annotated RNAs, repeats and circRNAs found in Tumor  
81 and uEvs are indicated. **b.** Number of expressed RNA features in Tumor and uEVs: 1,240 and  
82 8,796 circRNAs (orange) including respectively 819 (66%) and 4,530 (52%) present in circBase (hatched  
83 orange), 15,490 and 13,614 mRNA (violet), 3,776 and 1,907 lncRNAs (green), 1,225 and 823  
84 pseudogenes (yellow), 214 and 43 repeats (pink), 63 and 35 snRNAs (blue), 53 and 7 Pre-miRNAs (dark  
85 pink), 245 and 31 snoRNAs (red), 136 and 100 others (miscRNA, ribozyme, rRNA, scaRNA, scRNA, sRNA,  
86 tRNA; grey), respectively. **c.** Principal component analysis from expression of 311 circRNAs (left) and

87 274 lncRNAs (right) upregulated in uEVs ( $FC \geq 1.5$ , at least 20 counts), in 6 paired tumors (green) and  
88 uEVs (black) and 20 independent uEVs (pink), from prostate cancer patients.

89

90 **Extended Data Fig. 3. Selection of genes expressed in uEVs, enriched in prostate**  
91 **tissue. a.** Workflow of analysis to select prostate enriched expressed genes in uEVs biopsies. **b.** Venn  
92 diagram showing expressed genes in prostate cancer uEVs (white  $n = 10,937$ ), down regulated genes in  
93 healthy kidney (blue,  $n = 3,644$ ) and in urinary bladder (grey,  $n = 3,982$ ) compared to healthy  
94 prostate. **c.** Box-plot of  $\log_{10}$  TPM normalized expression of prostate (KLK2, KLK3, PCA3 and PMEPA1),  
95 kidney UMOD) and urinary bladder (UPK2) specific RNAs in Tumor biopsies (blue) and uEVs (red).

96

97 **Extended Data Fig. 4. uEVs are enriched in circRNAs and lncRNAs. a.** Mean gene expression of paired  
98 Tumor against uEVs. DEseq2 normalized counts, for each type of RNA are  
99 plotted; circRNAs (orange), lncRNAs (green), all others type of RNAs (grey). Each dot represents all  
100 transcripts for each gene. Following values are given for at least 5 counts for circRNA expression and  
101 20 counts for all other RNA expression. From 21,633 RNAs of patient 1,  $R^2 = 0.007$  for  
102 2,310 circRNAs and  $R^2 = 0.099$  for 2,979 lncRNAs. From 21,147 RNAs of patient 2,  $R^2 = 0.095$  for  
103 2,334 circRNAs and  $R^2 = 0.01$  for 2,811 lncRNAs. From 21,487 RNAs of patient 3,  $R^2 = 0.02$  for  
104 2,369 circRNAs and  $R^2 = 0.14$  for 3,008 lncRNAs. From 21,737 RNAs of patient 4,  $R^2 = 0.027$  for  
105 2,296 circRNAs and  $R^2 = 0.15$  for 3,213 lncRNAs. From 20,565 RNAs of patient 5,  $R^2 = 0.03$  for  
106 1,714 circRNAs and  $R^2 = 0.11$  for 2,857 lncRNAs. From 21,156 RNAs of patient 6,  $R^2 = 0.033$  for  
107 2,633 circRNAs and  $R^2 = 0.17$  for 2,883 lncRNAs. **b.** Number of over-expressed RNA species in  
108 Tumor (top) and in uEVs (bottom). **c.** Heatmap display unsupervised hierarchical clustering with  
109 euclidean distance (CED) of all differentially expressed transcripts ( $n = 13,261$ , fold change  $\geq 1.5$ ) in  
110 each of the individual samples from 6 Tumor biopsies (green) and paired 6 uEVs (black).  
111 Color scales represent  $\log_{10}(\text{normalized counts} + 1)$ .

112

113 **Extended Data Fig. 5. cell-EVs are enriched in circRNAs and lncRNAs and are depleted in introns. a.**  
114 Number of expressed RNA features in DU145, LNCaP and PC3 Cell lines and related cell-Evs. Hatched  
115 orange indicate the number of circRNAs found in circBase. **b.** Mean gene expression of paired Cell  
116 against cell-EVs. DEseq2 normalized counts, for each type of RNA are  
117 plotted; circRNAs (orange), lncRNAs (green), all others type of RNAs (grey). Each dot represents all  
118 transcripts for each gene. Following values are given for at least 5 counts for circRNA expression and  
119 20 counts for all other RNA expression. From 17,838 RNAs of DU145 cell line,  $R^2=0.33$  for  
120 2,009 circRNAs and  $R^2=0.34$  for 1,761 lncRNAs. From 17,666 RNAs of LNCaP cell line,  $R^2=0.2$  for  
121 2,384 circRNAs and  $R^2=0.3$  for 1,804 lncRNAs. From 19,742 RNAs of PC3 cell line,  $R^2=0.46$  for  
122 4,396 circRNAs and  $R^2=0.45$  for 1,546 lncRNAs. **c.** Genomic read counts distribution by percentage  
123 across exon, intron, 3'UTR, 5'UTR, intergenic and promoter in DU145, LNCaP, PC3 cell lines and  
124 associated cell-EVs.

125

126 **Extended Data Fig. 6. cell-EVs are depleted in nuclear lncRNAs. a.** Stacked barplot distribution, by  
127 percentage, of cytoplasmic (blue), nuclear (red), both (yellow) or non-polyA (grey) RNAs of expressed  
128 genes in cell and in cell-EVs. Experimental procedure to get the values are presented in fig. 3a.  
129 Percentage of expressed RNAs are indicated in each box. Above each barplot are noted the number of  
130 total RNAs **b.** Density distribution of  $\log_2$  (fold change cytoplasmic/nuclear ratio) per RNA types in  
131 DU145, LNCaP and PC3 cells and related cEVs (4,048; 2,366; 4,079 RNAs from cells and 3,112; 2,135;  
132 3,157 RNAs from cell-EVs, respectively), mRNA (purple), pseudogene (yellow), lncRNA (green) in Tumor  
133 (top) and uEVs (bottom). The left side of dotted line in both graphs corresponds to the nuclear RNAs,  
134 the right side corresponds to cytoplasmic RNAs.

135

136 **Extended Data Fig. 7. uEVs lncRNAs can be predicted to form strong binding neoantigens. a.**  
137 Predicted binding score rank for 65,190 Tumor-neoantigens coming from 255 lncRNA transcripts and  
138 for 3,298 uEVs-neoantigens from 16 lncRNA transcripts. 15,677 and 768 strong score lncRNA-

139 neopeptides (score<0.5) were predicted from Tumor (blue, median score= 0.253) and uEVs (red,  
140 median score=0.274) samples, respectively. 49,513 and 2,530 weak score lncRNA-  
141 neopeptides (score>0.5) were predicted from Tumor (median score=1.258) and uEVs (median  
142 score=1.283) samples, respectively. The difference between Tumor and uEVs rank of strong  
143 neoantigens is significant ( $p<0.05$ ) but not for weak neoantigens (NS). **b.** Number and lengths of strong  
144 predicted neoantigens in Tumor (blue, n=15,677) and uEVs (red, n=768).

145

146

147 **References**

- 148 1 Van Deun, J. *et al.* EV-TRACK: transparent reporting and centralizing knowledge in extracellular  
149 vesicle research. *Nature methods* **14**, 228-232, doi:10.1038/nmeth.4185 (2017).
- 150 2 Fagerberg, L. *et al.* Analysis of the Human Tissue-specific Expression by Genome-wide  
151 Integration of Transcriptomics and Antibody-based Proteomics. *Molecular & cellular*  
152 *proteomics : MCP* **13**, 397-406, doi:10.1074/mcp.M113.035600 (2014).
- 153 3 Wang, M., Zhao, Y. & Zhang, B. Efficient Test and Visualization of Multi-Set Intersections.  
154 *Scientific reports* **5**, 16923, doi:10.1038/srep16923 (2015).
- 155
